# Supplementary material for: Chemical reaction between an ITIC electron acceptor and an amine-containing interfacial layer in non-fullerene solar cells
Source: Royal Society of Chemistry journal article supplement (doi:10.1039/c7ta10306a), 2018-01-01
Supplement: c7ta10306a1.pdf [file c7ta10306a1.pdf]

## **Supporting information for**

### **Chemical reaction between ITIC electron acceptor and amine- containing interfacial layer in non-fullerene solar cells**

Lin Hu, Yun Liu, Lin Mao, Sixing Xiong, Lulu Sun, Nan Zhao, Fei Qin, Youyu Jiang,  
and Yinhua Zhou\*

Wuhan National Laboratory for Optoelectronics, School of Optical and Electronic  
Information, Huazhong University of Science and Technology, Wuhan 430074, China

\*Corresponding author: [yh\\_zhou@hust.edu.cn](mailto:yh_zhou@hust.edu.cn)

## Experimental Section:

### 1.1 Materials

The polymer donor poly[(2,6-(4,8-bis(5-(2-ethylhexyl)thiophen-2-yl)-benzo[1,2-b:4,5-b']dithiophene))-alt-(5,5-(1',3'-di-2-thienyl-5',7'-bis(2-ethylhexyl)benzo[1',2'-c:4',5'-c']dithiophene-4,8-dione))] (PBDB-T) and the non-fullerene acceptor 3,9-bis(2-methylene-(3-(1,1-dicyanomethylene)-indanone))-5,5,11,11-tetrakis(4-hexylphenyl)-dithieno[2,3-d:2',3'-d']-s-indaceno[1,2-b:5,6-b']dithiophene (ITIC) were purchased from Solarmer Materials Inc. The zinc acetate dihydrate, monoethanolamine and methoxyethanol for ZnO precursor solutions were purchased from Sigma-Aldrich. Chlorobenzene (99.5%), branched polyethyleniminepoly (PEI) and polyethylenimine ethoxylated (PEIE) was also from Sigma-Aldrich. The monomers indacenodithieno[3,2-b]thiophene (IDTT) and 2-(3-oxo-2,3-dihydroinden-1-ylidene)malononitrile (INCN) were purchased from Derthon Optoelectronic Materials Science Technology Co LTD. The acetone and isopropanol were obtained from Sinopharm Chemical Reagent Co., Ltd.

### 1.2 Materials and film characterization

For the materials and film characterization, the ITIC and PBDB-T were first dissolved in chlorobenzene (99.5%) with a concentration of 10 mg/ml, respectively. The solution was stirred vigorously overnight for use. For the UV-vis-NIR measurement, the films were fabricated by spin coating the solution onto a quartz substrate at a speed of 1000 rpm. The PEI or PEIE treated films were processed by exposing the films in a covered Petri dish. Subsequently, two drops PEI or PEIE solution were dropped in the Petri dish at 160 °C hot plate for different time. As for the solution, the ITIC and the PEI was mixed directly in chlorobenzene with various mass ratios. The absorption spectra were recorded on a UV-vis-NIR spectrophotometer (UV-3600, Shimadzu Scientific Instruments). For the ESR measurements, films were prepared by drop casting onto quartz substrates. After dry in a N<sub>2</sub>-filled glovebox, the resulted films were put into a quartz tube for test. The instrument model is Bruker ESR A300 and the frequency of the electromagnetic radiation was 9.425 GHZ. Fourier transform infrared (FT-IR) spectra were collected on a Bruker VERTEX 70 using potassium bromide (KBr) disks. The nuclear magnetic resonance (NMR) spectra were

collected on a Bruker Ascend™ 600 MHz NMR spectrometer with deuterated dichloromethane as the solvent and with tetramethylsilane ( $\delta=0$ ) as the internal standard.

### *1.3 Solar cells fabrication and characterization*

The pre-patterned ITO was first sonicated in baths using detergent in deionized water, deionized water, acetone, and isopropanol in sequence. Then the prepared ZnO precursor solutions were spin-coated onto ITO at 4000 rpm for 40 s. The substrate was annealed at 200 °C for 30 min to form a dense metal oxide film. The ZnO precursor solutions were prepared by adding 0.5 g zinc acetate dihydrate and 0.14 g monoethanolamine in 5 ml methoxyethanol, and stirring overnight. The PEI and PEIE interlayer was spin-coated on top at 5000 rpm for 1 min from isopropanol solution (0.1 wt.%), respectively. Subsequently, PBDB-T:ITIC (1:1 weight ratio) in a 20 mg/mL chlorobenzene:DIO (99.5:0.5 volume ratio) solution was spin-coated at 2500 rpm for 60 s. Then, the samples were then transferred into the vacuum evaporation system. 7 nm MoO<sub>3</sub> and 100 nm Ag was evaporated with a metal aperture mask to complete the device fabrication. Device area is 10.58 mm<sup>2</sup>. The fabricated devices were measured under a simulated 100 mW cm<sup>-2</sup> AM 1.5G irradiation in a N<sub>2</sub>-filled glovebox. A Keithley 2400 was applied to measure the current-voltage characteristics.

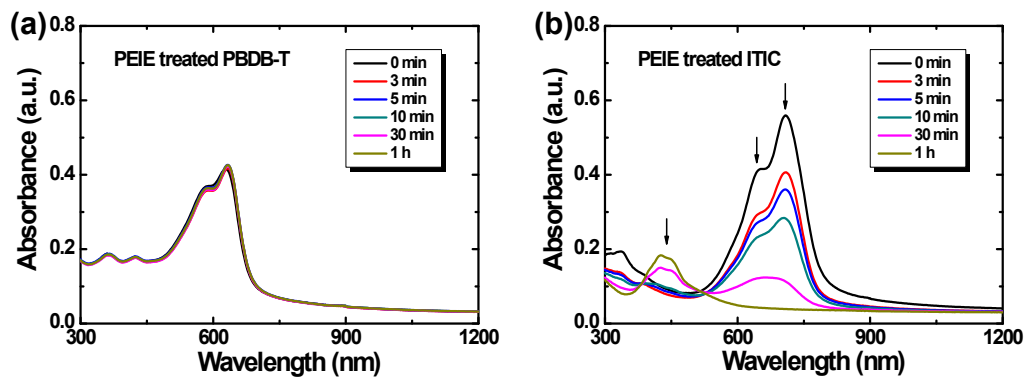

**Figure S1.** UV-vis-NIR absorption spectra of (a) PBDB-T and (b) ITIC films exposure for different time in amine vapor from PEIE.

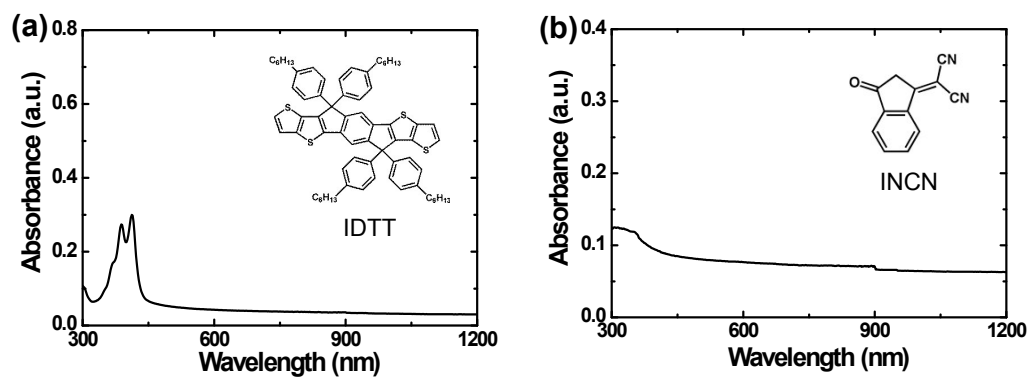

**Figure S2.** UV-vis-NIR absorption spectra of (a) the IDTT monomer and (b) the INCN monomer.

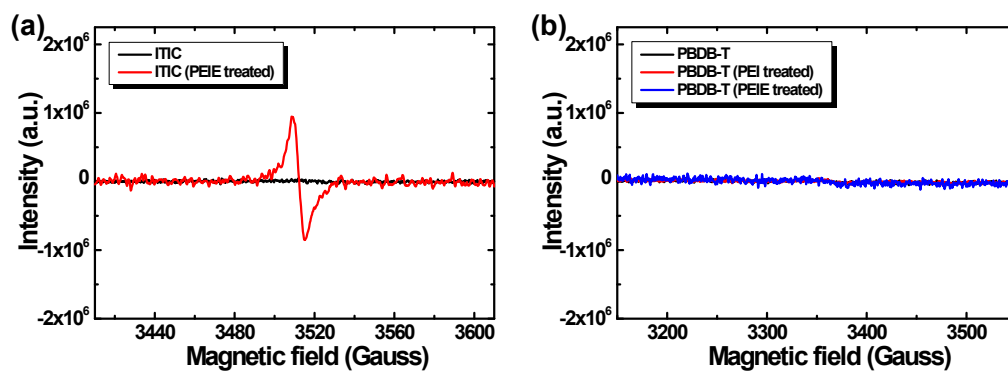

**Figure S3.** (a) The ESR spectra of pristine ITIC films and corresponding films treated with amine vapor from PEIE; (b) ESR spectra of pristine PBDB-T films and corresponding films treated with amine vapor from PEI and PEIE.

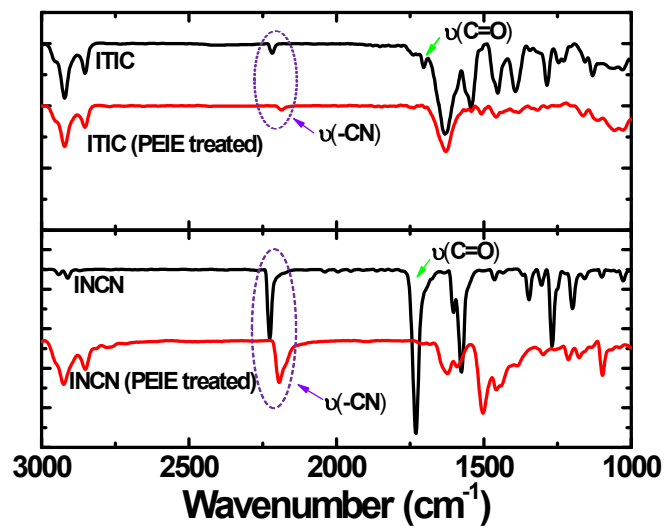

**Figure S4.** FT-IR spectra of ITIC and INCN monomer as well as the corresponding samples exposure in amine vapor from PEIE.

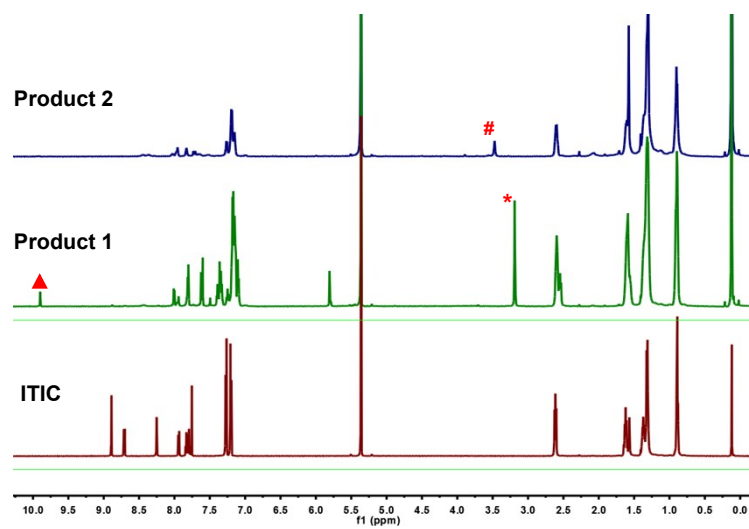

**Figure S5.** The <sup>1</sup>H NMR spectra of pristine ITIC and corresponding products. The reagent is CD<sub>2</sub>Cl<sub>2</sub>.



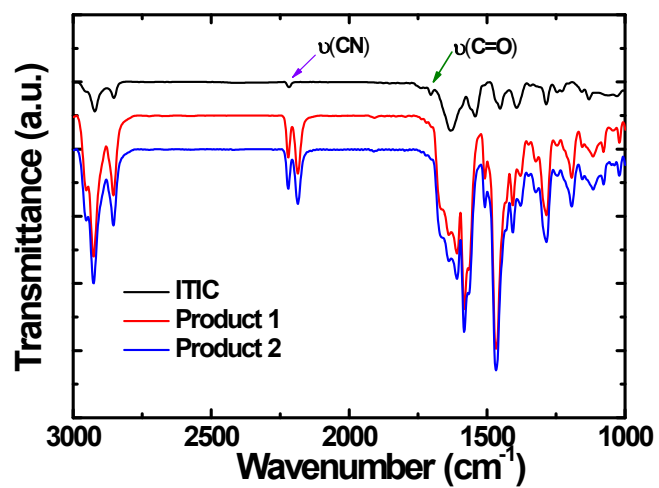

**Figure S6.** FT-IR spectra of ITIC and separated products from the reaction of ITIC and methylamine.
